# Supplementary material for: Effect of strain relaxation and the Burstein–Moss energy shift on the optical properties of InN films grown in the self-seeded catalytic process
Source: Royal Society of Chemistry journal article supplement (doi:10.1039/c5ce02339d), 2016-01-01
Supplement: c5ce02339d1.pdf [file c5ce02339d1.pdf]

Supporting Information:

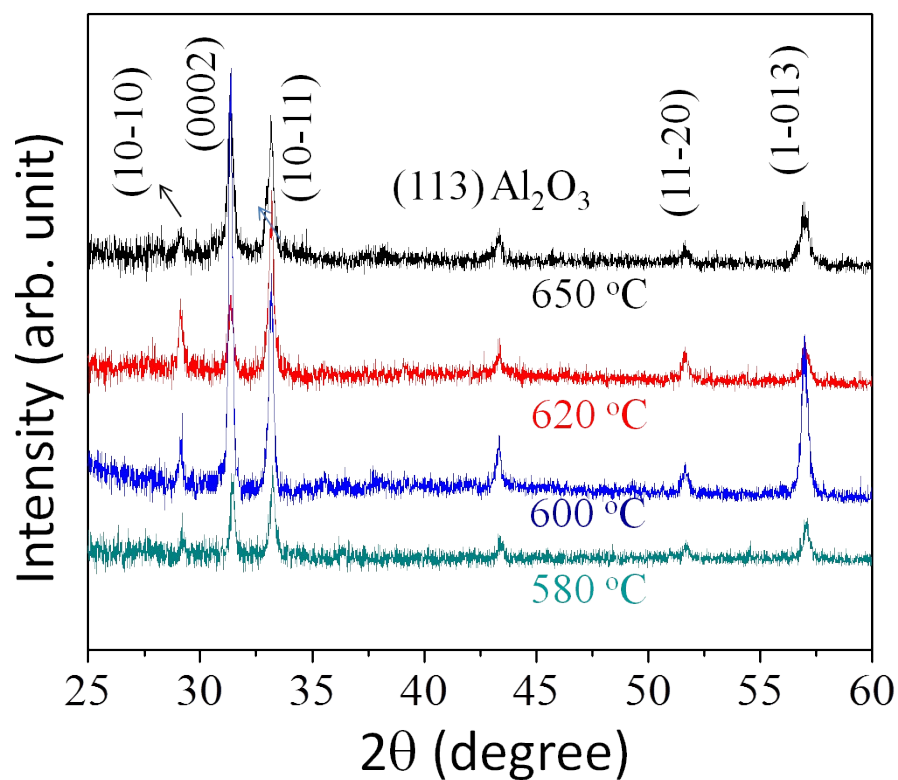

**Figure S1.** XRD pattern of InN samples grown at different temperatures.

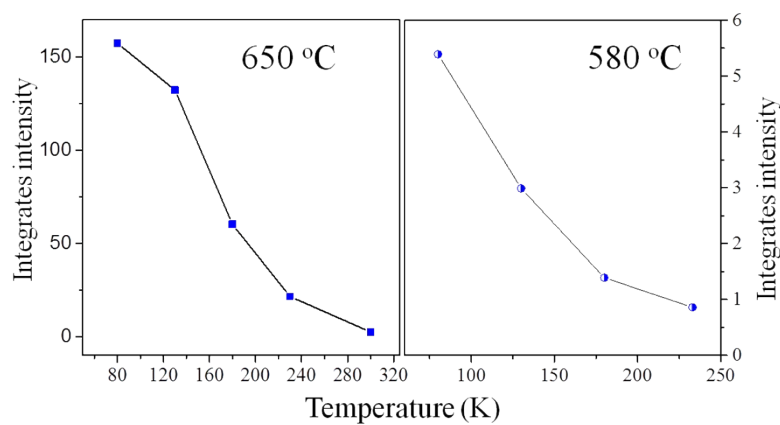

**Figure S2.** Temperature dependence of integrated PL intensity.
